# Supplementary material for: Photobiomodulation provides neuroprotection through regulating mitochondrial fission imbalance in the subacute phase of spinal cord injury
Source: PubMed Central journal article supplement — Neural Regen Res. 2023 Jan 5;18(9):2005–10. doi: 10.4103/1673-5374.366491 (PMC10233780; doi:10.4103/1673-5374.366491), 2023-01-05
Supplement: NRR-18-2005_Suppl1.pdf [file NRR-18-2005_Suppl1.pdf]

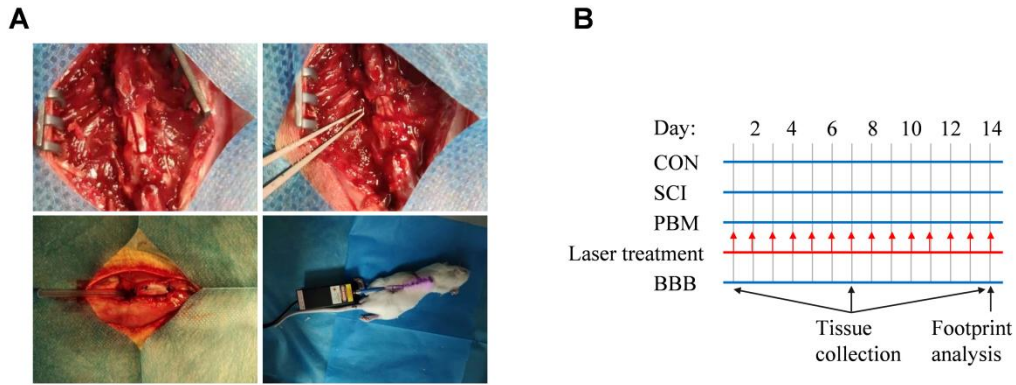

**Additional Figure 1 Animal experimental design and PBM administration.**

(A) Construction of spinal cord injury and optical fiber implantation. Top left: Exposed spinal cord tissue; Top right: injured spinal cord tissue; Bottom left: rats implanted with optical fibers; Bottom right: PBM-treated rats. (B) Animal experimental design. Immediately after operation, SCI rats were irradiated with an infrared light (810 nm, 150 mW) for 60 minutes. PBM treatment was given once a day at a fixed time point for 60 minutes each time. At 7 and 14 days after SCI, rats were sacrificed at 12 hours after PBM treatment. BBB: Basso, Beattie, and Bresnahan; CON: control; PBM: photobiomodulation; SCI: spinal cord injury.
