# Supplementary material for: Photobiomodulation provides neuroprotection through regulating mitochondrial fission imbalance in the subacute phase of spinal cord injury
Source: PubMed Central journal article supplement — Neural Regen Res. 2023 Jan 5;18(9):2005–10. doi: 10.4103/1673-5374.366491 (PMC10233780; doi:10.4103/1673-5374.366491), 2023-01-05
Supplement: NRR-18-2005_Suppl2.pdf [file NRR-18-2005_Suppl2.pdf]

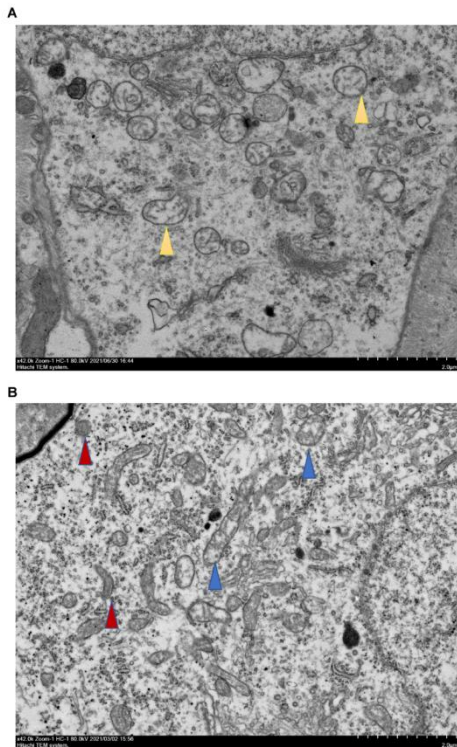

**Additional Figure 2 Effects of PBM on mitochondrial morphology at 1 day after SCI.**

(A) Representative TEM pictures of the mitochondrial morphology from SCI rats. Yellow arrowheads point to the swollen mitochondria with complete disappearance of cristae. (B) Representative TEM pictures of the mitochondrial morphology from PBM rats. Blue arrowheads point to the swollen mitochondria with partially disappearing cristae. Red arrowheads point to the mitochondria with normal cristae. Scale bars: 2  $\mu\text{m}$ . PBM: photobiomodulation; SCI: spinal cord injury; TEM: transmission electron microscope.
