# Supplementary material for: Photobiomodulation provides neuroprotection through regulating mitochondrial fission imbalance in the subacute phase of spinal cord injury
Source: PubMed Central journal article supplement — Neural Regen Res. 2023 Jan 5;18(9):2005–10. doi: 10.4103/1673-5374.366491 (PMC10233780; doi:10.4103/1673-5374.366491), 2023-01-05
Supplement: NRR-18-2005_Suppl3.pdf [file NRR-18-2005_Suppl3.pdf]

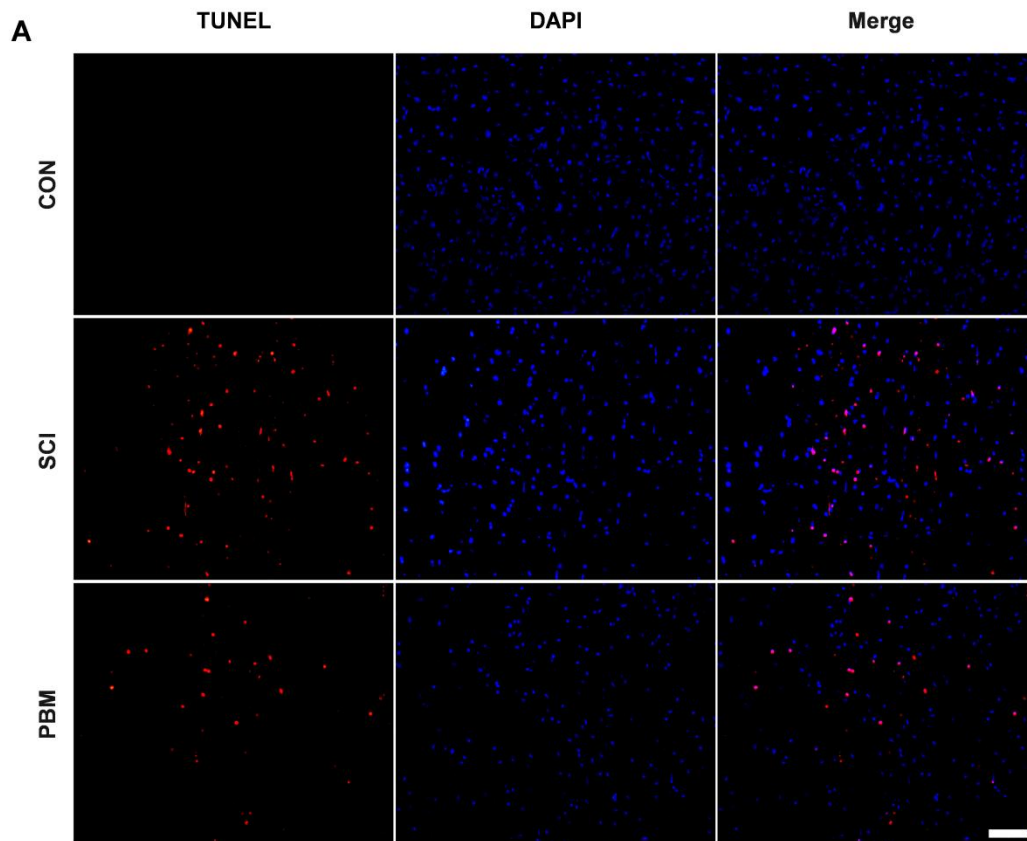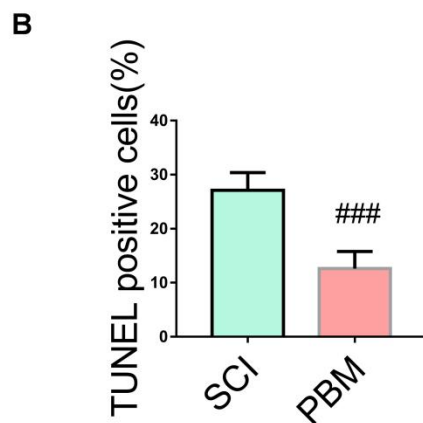

**Additional Figure 3 Effects of PBM on apoptosis at 14 days after SCI.**

(A) Representative TUNEL fluorescence images in spinal cord from rats at 14 days post-SCI. PBM could improve apoptosis at 14 days after SCI. Scale bar: 200  $\mu$ m. (B) Quantitative analyses of TUNEL positive cells in spinal cord at 14 days after operation. PBM could improve the level of apoptosis stained by TUNEL in injured spinal cord tissue. Data are expressed as mean  $\pm$  SEM (n = 3). <sup>###</sup>P < 0.001, vs. SCI group (one-way analysis of variance followed by least significant difference post hoc test). CON: control; DAPI: 4',6-diamidino-2-phenylindole; PBM: photobiomodulation; SCI: spinal cord injury; TUNEL: TdT-mediated dUTP nick end labeling.
